# Supplementary material for: Sex-Dependent Effects on Influenza-Specific Antibody Quantity and Neutralizing Activity following Vaccination of Newborn Non-Human Primates Is Determined by Adjuvants
Source: MDPI journal article supplement (doi:10.3390/vaccines12040415), 2024-04-15
Supplement: s1 [file s1]

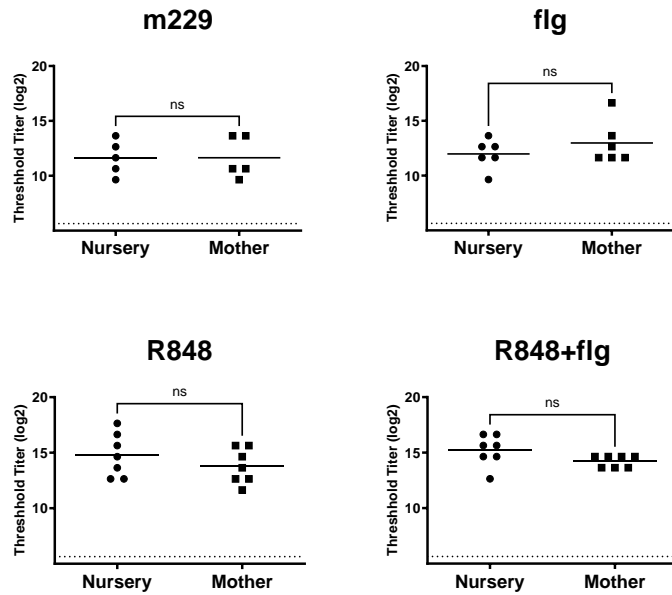

**Supplementary Figure S1. Anti-influenza IgG responses are similar in vaccinated nursery-reared versus mother-reared infants.** Influenza virus-specific IgG antibody in plasma was measured by ELISA on d21 p.b.
